# Supplementary material
Source: Springer Nature journal article supplement (https://www.springermedizin.de/resource/supplementary/12947_2009_300_MOESM7_ESM.pdf/9556652)

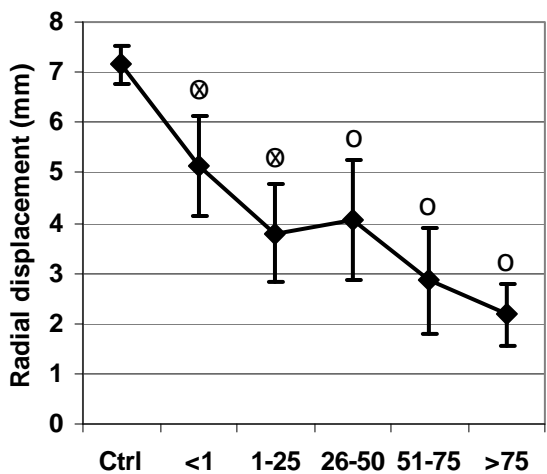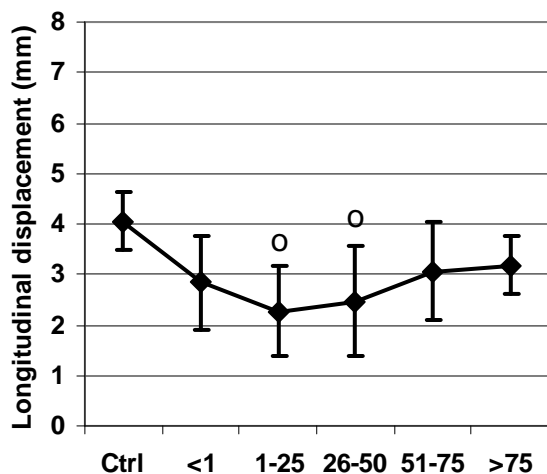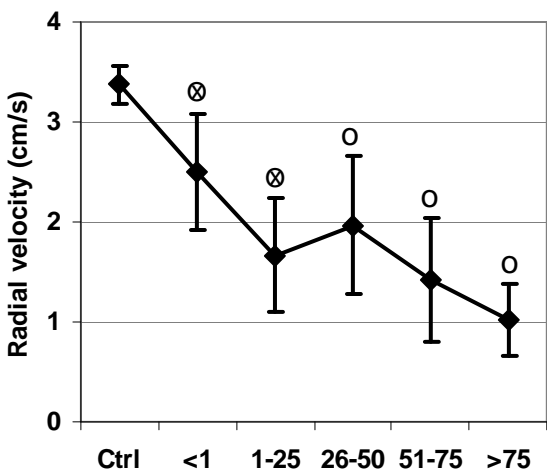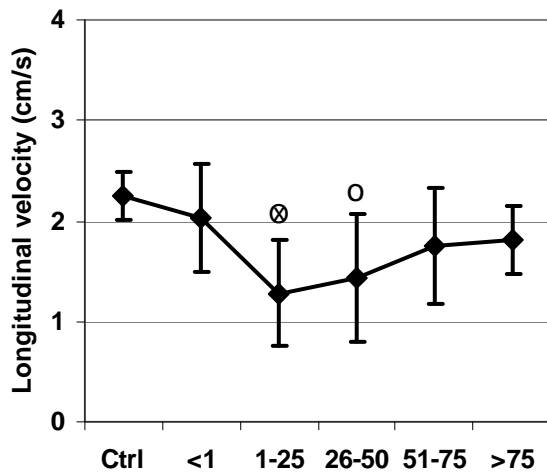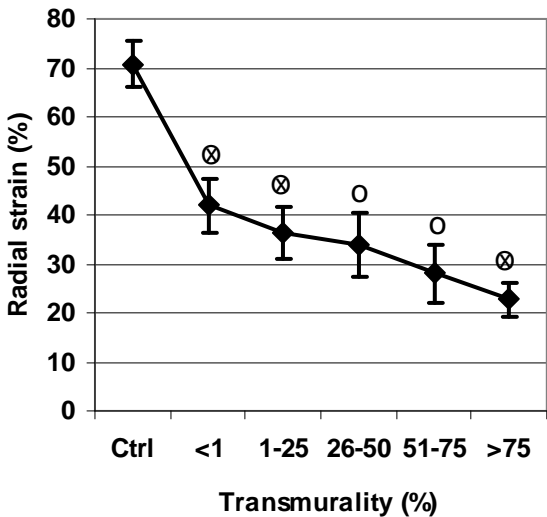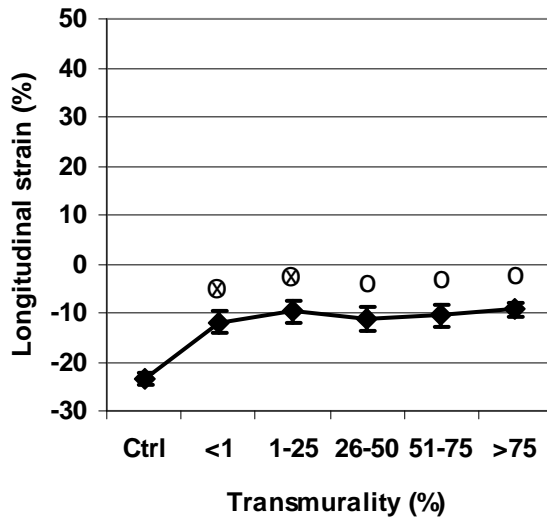

Supplement: MOESM7 [file 9556652]
